# Supplementary material for: The Relaxation Model of Relation between Elastic Modulus and Thermal Expansivity of Thermosetting Polymers’ and Frps’
Source: Preprints.org preprint supplement (doi:10.20944/preprints202301.0236.v1), 2023-01-13
Supplement: Supplementary file 3 [file Reviewer 1. The answers No.1.edited.docx]

| Dear Reviewer,  The authors would like to express their sincere gratitude for the additional comments that have improved the work. These recommendations will also be taken into account in future studies. | |
| --- | --- |
| Ø   F1. What is strain used to model it? | In the study tensile strain was used. It was added in 261-263 line |
| Sec2. Does diameter and length control this modulus and thermal expansion characteristic? | FRPs’ samples size influences the MoE results, but we used close sizes of samples for MoE and CTe testing, so we think that we excluded scale factors from relation |
