# Supplementary material for: The Relaxation Model of Relation between Elastic Modulus and Thermal Expansivity of Thermosetting Polymers’ and Frps’
Source: Preprints.org preprint supplement (doi:10.20944/preprints202301.0236.v1), 2023-01-13
Supplement: Supplementary file 4 [file Reviewer 2-3. The answers No.2.edited.docx]

| Comments and Suggestions for Authors  Suggestions have been sufficiently met, and however some aspects have been explained.  Dear Reviewer,  The authors would like to express their sincere gratitude for the additional comments that have improved the work. Many comments and recommendations will also be taken into account in future studies. |
| --- |
