# Supplementary material for: The Relaxation Model of Relation between Elastic Modulus and Thermal Expansivity of Thermosetting Polymers’ and Frps’
Source: Preprints.org preprint supplement (doi:10.20944/preprints202301.0236.v1), 2023-01-13
Supplement: Supplementary file 5 [file Reviewer 2. The answers No.2.edited.docx]

| Dear Reviewer,  The authors would like to express their sincere gratitude for the additional comments that have improved the work. Many comments and recommendations will also be taken into account in future studies. | |
| --- | --- |
| 1. in Fig. 4, 5, 6, 7. units in Russian (MPa) appear - the language of the journal is English; | It was corrected |
| 2. The text seems to lack citations, because there are only empty brackets []; | It was corrected |
| 3. Already on the first page of the manuscript, it is obvious how sloppy the text has been prepared if there is a problem with the authors and their affiliations | We don’t have problems with author’s affiliation, but there were mistakes in preparing of manuscript, not study and results. Thanks for comment |
| 4. There are a huge number of Equations in the article and they are not mentioned in the text - only maybe 1 (Barker) and 9 (Authors) | Except Barker’s the all other equations are author’s modelling, we added the comment about this at line 262 |
| 5. In the presented text there is a detailed description of materials and methods, there are also conclusions, but there is no detailed analysis and discussion of the results | we added some analyze at lines 303-316 |
