# Supplementary material for: The Relaxation Model of Relation between Elastic Modulus and Thermal Expansivity of Thermosetting Polymers’ and Frps’
Source: Preprints.org preprint supplement (doi:10.20944/preprints202301.0236.v1), 2023-01-13
Supplement: Supplementary file 7 [file Reviewer 4. The answers No.4.edited.docx]

| Dear Reviewer,  The authors would like to express their sincere gratitude for the additional comments that have improved the work. The comments and recommendations will also be taken into account in future studies. | |
| --- | --- |
| 1. the abstract should be more extended in accordance with the journal format (max 200 words). Materials, methods and results should be described | Abstract is modified |
| 2. all the acronyms should be explained | It’s done |
| 3. Terms of equations 1 and 2 should be explained | The terms are added |
| 4. what the dots indicate in Temperature range: "20 … 1500°C" "Colding and heating intensity: 0.01 K/min … 50 K/min" Please use a different symbol | It is corrected |
| 5. What does mean: Linear range: 500 mcr (please use SI units) | It is corrected |
| 6. Please, explain the dilatometric method through images shown in Figure 2. | The explanation is added |
| 7. Pay attention to axis E in MPa and temperature T, °C | It’s corrected |
| 8. The description of results is too sparse. First of all, figures should be introduced, then, the trend should be deepened and described  9. Results of dilatometric and mechanical measurements should be divided and explained separately | Lines 216-222 and the citation was added because specifies of dilatometric and mechanical researches were widely described in two previous studies, this study was pointed on MoE-CTe relation modelling |
| 10. as adequate []” missing reference | It’s corrected |
